# Supplementary material for: The highly conserved eukaryotic DRG factors are required for efficient translation in a manner redundant with the putative RNA helicase Slh1
Source: PubMed Central journal article supplement — Nucleic Acids Res. 2010 Nov 13;39(6):2221–33. doi: 10.1093/nar/gkq898 (PMC3064805; doi:10.1093/nar/gkq898), 2010-11-13
Supplement: supp_gkq898_Supplementary_material_REVISED_final.pdf [file supp_gkq898_Supplementary_material_REVISED_final.pdf]

## Supplementary information for:

THE HIGHLY CONSERVED EUKARYOTIC DRG FACTORS ARE REQUIRED FOR  
EFFICIENT TRANSLATION IN A MANNER REDUNDANT WITH THE PUTATIVE  
RNA HELICASE SLH1

Marie-Claire Daugeron<sup>1,2\*</sup>, Manoël Prouteau<sup>1,2,#</sup>, François Lacroute<sup>1</sup>, and Bertrand  
Séraphin<sup>1,3\*</sup>

Addresses: Equipe Labellisée La Ligue, <sup>1</sup> CGM, CNRS FRE3144, 1 Avenue de la Terrasse,  
91198 Gif sur Yvette Cedex, France; <sup>2</sup> Univ Paris-Sud, Orsay, F-91405; <sup>3</sup> IGMBC (Institut de  
Génétique et de Biologie Moléculaire et Cellulaire), Illkirch F-67400, France; CNRS,  
UMR7104, Illkirch F-67404, France; Inserm, U964, Illkirch F-67400, France; and Université  
de Strasbourg, Strasbourg F-67000, France

\*: Corresponding authors

Emails: daugeron@cgm.cnrs-gif.fr

seraphin@igbmc.fr

# present address: CMU / GEDEV Rue Michel Servet 1211 Genève 4 Suisse

## Supplementary Material and Methods

### Genetic screen for mutant displaying a negative synthetic interaction with a *Δrbg1Δrbg2* double deletion.

Two *Δrbg1Δrbg2 ura3-1* strains of opposite mating type were constructed (BSY1995 and BSY996). Both strains exhibited wild type growth. BSY1995 was transformed with a plasmid containing the *RBG1* and *URA3* genes (pMCD-F10). The transformed cells grew on 5FOA-plates as well as a wild-type control indicating that plasmid loss occurred and was not disadvantageous. The BSY1995 strain containing pMCD-F10 was grown at 30°C on 2% glucose CSM-Uracil plate for two days at 30°C. Colonies were scraped from the plate and cell dilutions were plated on YPDA ( $7 \times 10^7$  cells per plates) for UV mutagenesis (50 J/m<sup>2</sup>, ca. 1% survival) and further incubated two days at 30°C after UV mutagenesis. Colonies were then scraped from the plates, resuspended in water and cell dilutions were plated on CSM ( $2 \times 10^3$  cells per plate; 40 plates). After two days incubation at 30°C, CSM plates were replica-plated on 5-FOA containing plates (80000 colonies tested). The latter were incubated at 30°C and regularly observed under a binocular to identify clones that either did not grow or only poorly. The corresponding clones were recovered from the master CSM plates and streaked again on CSM and 5-FOA plates to confirm the first observation. They were also transformed with a *TRP1*-plasmid containing the *RBG1* gene or the empty plasmid as a control. Clones able to grow well on 5-FOA plates in the presence of the *RBG1*-containing plasmid but not in the presence of the empty plasmid were selected as candidates. Those were then backcrossed several times to the *Δrbg1Δrbg2* strain of opposite mating type before further analysis. The three independent mutants that we isolated had a strong growth defect in absence of both *RBG1* and *RBG2* but were not synthetically lethal. Standard genetic assays demonstrated that recessive mutation in the same gene had been identified.

As complementation of the slow growth phenotype with genomic libraries led only to the

recovery of *RBG1* or *RBG2* (not shown), we prepared a genomic library from a  $\Delta rbg1\Delta rbg2$  strain. Briefly, genomic DNA from the BSY1996 strain was partially digested with *Sau3A*, large DNA fragments were gel purified and ligated in a *Bam*HI-linearized pFL38 plasmid (centromeric, *URA3*). After transformation of the ligation mixtures into Electromax DH5<sup>E</sup> Cells (Invitrogen) bacterial strain, 2 10<sup>6</sup> clones were obtained and pooled. Plasmid DNA was extracted and used to transform the BSY2035 mutant. Fast growing yeast transformants were identified and processed as described previously. In only one case, plasmid rescue and back transformation confirmed that complementation was plasmid linked. This plasmid, pMCD-S0, contained a genomic insert encompassing a portion of *YTA7* gene plus the entire *SLH1* gene. A *Pst*I fragment containing a shorter portion of *YTA7* plus *SLH1* was subcloned into *Pst*I-linearized YCplac111 giving pMCD-S4, which was still able to complement BSY2035. Finally, a  $\Delta slh1\Delta rbg1\Delta rbg2$  strain was constructed and crossed with BSY1996 and BSY2035 for complementation and recessivity tests followed by meiotic segregation analysis. This demonstrated that the mutated locus was indeed *SLH1*.

### **Plasmid construction**

Plasmids encoding the various *RBG1* alleles were constructed as follow.

A DNA fragment containing the *RBG1* gene flanked by *Bam*HI and *Pst*I restriction sites was amplified from genomic DNA using the primer set OBS2834/OBS2837 and cloned into a *Bam*HI-*Pst*I linearized pFL38 plasmid to give **pMCD-F10**.

A DNA fragment containing the open reading frame and 3' region of the *RBG1* gene, flanked by *Sal*I and *Sph*I restriction sites was amplified from genomic DNA using the primers set OBS2058/OBS2059 and subcloned into the *Sal*I-*Sph*I restricted pAS24 plasmid that contains *GAL* promoter region and a HA epitope tag (1). Subsequently, an *Nco*I-*Sph*I fragment (A), containing the *RBG1* ORF with an N terminal HA epitope tag and the *RBG1* 3' region, was

recovered from this plasmid. A DNA fragment (B), containing the putative promoter region of *RBG1* flanked by BamHI and NcoI restriction sites, was amplified from genomic DNA using the primer set OBS3219/OBS2834. The BamHI-NcoI restricted DNA fragment B and the NcoI-SphI restricted DNA fragment A were cloned into a BamHI-SphI linearized YCplac111 to give **pMCD-F13**.

The plasmids carrying the *rbg1* mutant alleles were obtained by PCR fusion. For example, to generate the *rbg1 GFVSVGKS* allele, two DNA fragments with overlapping regions were amplified from pMCD-F13 using the two primer sets OBS2065/M13rev and OBS2066/M13for. A DNA fragment containing the *rbg1 GFVSVGKS* gene flanked by BamHI-SphI restriction sites was further obtained by PCR fusion using the two previous PCR products as DNA template and the primers set M13rev/M13. This fragment was cloned into a BamHI-SphI linearized YCplac111 plasmid to give **pMCD-F14**. A similar procedure was used to generate the pMCD-F15 to pMCD-F20 plasmids. The corresponding primers sets are listed in table S2.

Plasmids encoding the various *SLH1* alleles were constructed as follow.

The plasmid **pMCD-S0** was isolated from a pFL36 plasmid-borne genomic library by complementation of the slow-growth phenotype of the BSY2035 strain and contains an insert of 7,6 Kb encompassing *SLH1* and a portion of *YTA7*. A 6,9Kb PstI restriction fragment encompassing *SLH1* was cloned into a PstI-linearized pMCDV11 plasmid to give **pMCD-S4**. (The plasmid pMCD-V11 was generated by religation of a NarI-EcoRI linearized YCplac 111)

To construct **pMCD-S5**, encoding Slh1 AptGaAAA mutant protein, two DNA fragments with overlapping regions were amplified using pBS1479 (TAP tag) as template with the primers set OBS3872/OBS3873 and pMCD-S4 as template with the primers set OBS3874/OBS3875. The two resulting fragments were then used as DNA template with the primers set

OBS3873/OBS3875 to obtain a DNA fragment containing the 3' part of the *SLH1* ORF followed in frame by the ProtA tag and a part of the 3' end of the *SLH1* gene (from the OBS3873 oligonucleotide). The DNA fragment was transformed into BSY2047 yeast cells together with an EcoRI-SnaBI linearized pMCD-S4 to perform plasmid gap repair and to generate **pMCD-S5**.

For **pMCD-S6**, two DNA fragments with overlapping regions were amplified from pMCD-S4 using the two primer sets OBS3876/OBS3879 and OBS3877/OBS3878. The fragments were used as template for the fusion PCR with the primers set OBS3877/OBS3878. The resulting DNA fragment was transformed into BSY2047 yeast cells together with a SapI-KpnI linearized pMCD-S5 to perform plasmid gap repair and to generate **pMCD-S6**.

Plasmids encoding the various *TMA46* and *GIR2* alleles were constructed as follow.

Two DNA fragments with overlapping regions were amplified from genomic DNA using the primers sets OBS262/OBS3467 and OBS263/OBS3298. They were used as templates for PCR fusion using the primers set OBS262/OBS263 to generate a DNA fragment containing the *TMA46* gene with an in frame sequence encoding two HA epitope Tag introduced just after the start codon. The PCR product was first cloned using the Zero Blunt<sup>R</sup> TOPO<sup>R</sup> PCR cloning kits from Invitrogen and a NotI-PstI fragment was recovered after digestion of the resulting plasmid. This fragment was then cloned into a NotI-PstI linearized pFL36 plasmid to give **pMCD-T6**. A similar procedure was used to construct **pMCD-G2**, the corresponding primer sets used are indicated in table S3

The plasmids carrying the *tma46* or *gir2* mutant alleles were obtained by the following procedure. For example, to generate the *tma46* *ACCH-1* allele, two DNA fragments with overlapping regions were amplified from pMCD-T6 using the two primer sets M13rev/OBS3502 and M13for/OBS3503 and then used as template for the fusion PCR with the primers set M13rev/M13for. The resulting DNA fragment was digested by NotI and PstI

restriction enzymes and cloned into a NotI-PstI linearized YCplac111 plasmid to give **pMCD-T11**. A similar procedure was used to generate the **pMCD-T12 to pMCD-T15** plasmids and the **pMCD-G3** and **pMCD-G4** plasmids. The corresponding primers sets and DNA templates are listed in table S2.

**Supplementary Table S1: Yeast strains used in this study**

| <b>Strains</b>      | <b>Notes</b>                                           | <b>Relevant genotypes</b>                                                                                          |
|---------------------|--------------------------------------------------------|--------------------------------------------------------------------------------------------------------------------|
| <b>BMA64a</b>       | WT (reference strain)                                  | <i>MATa ade 2-1 his3-11,15 leu2-3,112 Δtrp1 ura3-1 can1-100</i>                                                    |
| <b>BMA64α</b>       | WT (reference strain)                                  | <i>MATα ade 2-1 his3-11,15 leu2-3,112 Δtrp1 ura3-1 can1-100</i>                                                    |
| <b>BSY1143</b>      | <i>Δtma46</i>                                          | <i>MATa Δtma46::HISMX6</i>                                                                                         |
| <b>BSY1261</b>      | <i>Tma46-TAP Rbg1-HA</i>                               | <i>MATa TMA46-TAPtag-TRPK1 RBG1-his<sub>6</sub>-HA<sub>3</sub>-HISMX6 POP2-his<sub>6</sub>-VSV<sub>3</sub></i>     |
| <b>BSY1375</b>      | <i>Tma46-TAP</i>                                       | <i>MATα TMA46-TAPtag-TRPK1</i>                                                                                     |
| <b>BSY1421</b>      | <i>Rbg1-TAP</i>                                        | <i>MATα RBG1-TAP-TRPK1</i>                                                                                         |
| <b>BSY1586</b>      | <i>Δrbg1Δtma46</i>                                     | <i>MATa Δtma46::HISMX6 Δrbg1::HISMX6</i>                                                                           |
| <b>BSY1588</b>      | <i>Δrbg1</i>                                           | <i>MATα Δrbg1::HISMX6</i>                                                                                          |
| <b>BSY1935</b>      | <i>Δgir2</i>                                           | <i>MATa Δgir2::KanMX4</i>                                                                                          |
| <b>BSY1966</b>      | <i>Rbg2-TAP</i>                                        | <i>MATa RBG2-TAPtag-TRPK1</i>                                                                                      |
| <b>BSY1968</b>      | <i>Δtma46Δgir2</i>                                     | <i>MAT? Δtma46::HISMX6 Δgir2::KanMX4</i>                                                                           |
| <b>BSY1969</b>      | <i>Δtma46Δrbg2</i>                                     | <i>MAT? Δtma46::HISMX6 Δrbg2::KanMX4</i>                                                                           |
| <b>BSY1994</b>      | <i>Δrbg2</i>                                           | <i>MATα Δrbg2::KanMX4</i>                                                                                          |
| <b>BSY1996</b>      | <i>Δrbg1Δrbg2</i>                                      | <i>MATa Δrbg1::HISMX6 Δrbg2::KanMX4</i>                                                                            |
| <b>BSY1998</b>      | <i>Δrbg1Δgir2</i>                                      | <i>MATa Δrbg1::HISMX6</i>                                                                                          |
| <b>BSY2024</b>      | <i>BSY2031XBSY1996</i>                                 | <i>MATa/α Δrbg1::HISMX6/Δrbg1::HISMX6</i>                                                                          |
| <b>BSY2025</b>      | <i>BSY2033XBSY1996</i>                                 | <i>Δrbg2::KanMX4/Δrbg2::KanMX4 slh1/SLH1</i>                                                                       |
| <b>BSY2026</b>      | <i>BSY2035XBSY1996</i>                                 |                                                                                                                    |
| <b>BSY2031</b>      | <i>Three haploids isolates from the genetic screen</i> | <i>MATa Δrbg1::HISMX6 Δrbg2::KanMX4 slh1</i>                                                                       |
| <b>BSY2033</b>      |                                                        |                                                                                                                    |
| <b>BSY2035</b>      |                                                        |                                                                                                                    |
| <b>BSY2046</b>      | <i>Δslh1</i>                                           | <i>MATa Δslh1::URA3K1</i>                                                                                          |
| <b>BSY2049</b>      | <i>Δrbg1Δrbg2Δslh1</i>                                 | <i>MATα Δrbg1::HISMX6 Δrbg2::KanMX4 Δslh1::URA3K1</i>                                                              |
| <b>BSY2057</b>      | <i>Δtma46Δgir2Δslh1</i>                                | <i>MATa Δtma46::HISMX6 Δgir2::KanMX4 Δslh1::TRPK1</i>                                                              |
| <b>BSY2061</b>      | <i>Δrbg1Δgir2Δslh1</i>                                 | <i>MATa Δrbg1::HISMX6 Δgir2::KanMX4 Δslh1::URA3K1</i>                                                              |
| <b>BSY2094</b>      | <i>Δrbg1Δtma46Δslh1</i>                                | <i>MATa Δtma46::HISMX6 Δrbg1::HISMX6 Δslh1::URA3K1</i>                                                             |
| <b>BSY2096</b>      | <i>Δrbg2Δgir2Δslh1</i>                                 | <i>MATa Δgir2::KanMX4 Δslh1::URA3K1</i>                                                                            |
| <b>BSY2098</b>      | <i>Δrbg2Δgir2</i>                                      | <i>MATa Δgir2::KanMX4 Δrbg2::KanMX4</i>                                                                            |
| <b>BSY2099</b>      | <i>Slh1-TAP</i>                                        | <i>MATa SLH1-TAPtag-TRPK1</i>                                                                                      |
| <b>BSY2316</b>      | <i>Slh1ΔRL2</i>                                        | <i>MAT? slh1ΔRL2-TAPtag-TRPK1</i>                                                                                  |
| <b>CDK33-9A (2)</b> | <i>cdc33-1</i>                                         | <i>MATα ade 2-1 his3-11,15 leu2-3,112 trp1-1 ura3-1 can1-100 Δcdc33::LEU2 YCplac33-cdc33-1</i>                     |
| <b>SS13-3A (3)</b>  | <i>tif1-1</i>                                          | <i>MATα ade 2-1 his3-11,15 leu2-3,112 trp1-1 ura3-1 can1-100 Δtif1::HIS3 Δtif2::ADE2 pSSC120 (CEN-LEU2)-tif1-1</i> |
| <b>CDK45-6A (2)</b> | <i>prt1-1</i>                                          | <i>MATα ade 2-1 his3-11,15 leu2-3,112 trp1-1 ura3-1 can1-100 prt1-1</i>                                            |

**Supplementary Table S2: Plasmids used in this study**

| <b>Names</b>             | <b>Features</b>                                  | <b>References</b> |
|--------------------------|--------------------------------------------------|-------------------|
| pMCD-F10                 | pFL38-CII- <i>RBG1</i> (ARS-CEN URA3)            | this study        |
| pMCD-F13                 | YCplac111- <i>HA-RBG1</i> (ARS-CEN <i>LEU2</i> ) | this study        |
| pMCD-F14                 | YCplac111- <i>HA-rbg1-GFVSVGKS</i>               | this study        |
| pMCD-F15                 | YCplac111- <i>HA-rbg1-GFPSVGKN</i>               | this study        |
| pMCD-F16                 | YCplac111- <i>HA-rbg1-GFPSVAKS</i>               | this study        |
| pMCD-F17                 | YCplac111- <i>HA-rbg1-GFPSVAAA</i>               | this study        |
| pMCD-F18                 | YCplac111- <i>HA-rbg1-DLPGQ</i>                  | this study        |
| pMCD-F19                 | YCplac111- <i>HA-rbg1-ALPAI</i>                  | this study        |
| pMCD-F20                 | YCplac111- <i>HA-rbg1-IKIA</i>                   | this study        |
| pMCD-F21                 | YCplac111- <i>HA-rbg1-ΔTGS</i>                   | this study        |
| pMCD-S0                  | pFL38-library insert 1 (ARS-CEN URA3)            | this study        |
| pMCD-V11                 | pBS3122-ΔNarI-EcoRI                              | this study        |
| pMCD-S4                  | YCplac111- <i>SLH1</i>                           | this study        |
| pMCD-S5                  | YCplac111- <i>SLH1-ProtA</i>                     | this study        |
| pMCD-S6                  | YCplac111- <i>slh1-AptGaAAA</i>                  | this study        |
| pMCD-T6                  | pFL36- <i>HA-TMA46</i>                           | this study        |
| pMCD-T11                 | pFL36- <i>HA-tma46-ACCH1</i>                     | this study        |
| pMCD-T12                 | pFL36- <i>HA-tma46-CCAH1</i>                     | this study        |
| pMCD-T13                 | pFL36- <i>HA-tma46-ACCH2</i>                     | this study        |
| pMCD-T14                 | pFL36- <i>HA-tma46-CCAH2</i>                     | this study        |
| pMCD-T15                 | pFL36- <i>HA-tma46-ACAH1</i>                     | this study        |
| pMCD-G2                  | pFL36- <i>HA-GIR2</i>                            | this study        |
| pMCD-G3                  | pFL36- <i>HA-gir2-ΔRWD/G1</i>                    | this study        |
| pMCD-G4                  | pFL36- <i>HA-gir2-ΔDFRP</i>                      | this study        |
| pFA6a-hisMX6             | Disruption cassettes                             | (4)               |
| pFA6a-kanMX4             | Disruption cassettes                             | (4)               |
| pUC19-URA3 <sub>KI</sub> | Disruption cassettes                             | This study        |
| pUC19-TRP1 <sub>KI</sub> | Disruption cassettes                             | This study        |
| pBS1479                  | TAP-tag                                          | (5)               |
| pU6H3HA                  | HA-tag                                           | (6)               |
| pAS24                    | pGAL-HA                                          | (1)               |
| pBS3122                  | YCplac111-Sap1 mutated                           | (7)               |



**Supplementary Table S3: Primers sets used for PCR amplification of fragments used for cloning or genomic integration**

| Notes                                               | Sets of primers                                      | DNA template        |
|-----------------------------------------------------|------------------------------------------------------|---------------------|
| <u>PCR fragments used for genomic integration</u>   |                                                      |                     |
| <i>Atma46</i>                                       | OBS256/OBS257                                        | pFA6a-hisMX6        |
| <i>Arbg1</i>                                        | OBS1111/OBS1112                                      | pFA6a-hisMX6        |
| <i>Arbg2</i>                                        | OBS1959/OBS1960                                      | pFA6a-kanMX4        |
| <i>Agir2</i>                                        | OBS2592/OBS2593                                      | pFA6a-kanMX4        |
| <i>Aslh1</i>                                        | OBS3151/OBS3152                                      | Puc19-TRP1KI/URA3KI |
| <i>TMA46-TAP</i>                                    | OBS264/OBS265                                        | pBS1479             |
| <i>RBG1-TAP</i>                                     | OBS1118/OBS1119                                      | pBS1479             |
| <i>RBG2-TAP</i>                                     | OBS1961/OBS1962                                      | pBS1479             |
| <i>SLH1-TAP</i>                                     | OBS3153/OBS3154                                      | pBS1479             |
| <i>slh1ARL2-TAP</i>                                 | OBS3886/OBS3154                                      | pBS1479             |
| <i>RBG1-HA</i>                                      | OBS627/OBS628                                        | pU6H3HA             |
| <u>PCR fragments used for plasmid constructions</u> |                                                      |                     |
| <i>RBG1</i>                                         | OBS2834/OBS2837                                      | genomic DNA         |
| <i>HA-RBG1</i>                                      | OBS2058/OBS2059; OBS3219/OBS2834                     | genomic DNA         |
| <i>HA-rbg1-GFVSVGKS</i>                             | OBS2065/M13rev; OBS2066/M13for; M13rev/M13for        | pMCD-F13            |
| <i>HA-rbg1-GFPSVGKN</i>                             | OBS2067/M13rev; OBS2068/M13for; M13rev/M13for        | pMCD-F13            |
| <i>HA-rbg1-GFPSVAKS</i>                             | OBS2069/M13rev; OBS2070/M13for; M13rev/M13for        | pMCD-F13            |
| <i>HA-rbg1-GFPSVAA</i>                              | OBS2071/M13rev; OBS2072/M13for; M13rev/M13for        | pMCD-F13            |
| <i>HA-rbg1-DPLGQ</i>                                | OBS2073/M13rev; OBS2074/M13for; M13rev/M13for        | pMCD-F13            |
| <i>HA-rbg1-ALPAI</i>                                | OBS2075/M13rev; OBS2076/M13for; M13rev/M13for        | pMCD-F13            |
| <i>HA-rbg1-IKIA</i>                                 | OBS2077/M13rev; OBS2078/M13for; M13rev/M13for        | pMCD-F13            |
| <i>HA-rbg1-ATGS</i>                                 | OBS2060/M13rev; OBS2061/M13for; M13rev/M13for        | pMCD-F13            |
| <i>SLH1-PROTA</i>                                   | OBS3872/OBS3873; OBS3874/OBS3875;<br>OBS3873/OBS3875 | PBS1479/pMCD-S4     |
| <i>slh1-AptGaAAA-PROTA</i>                          | OBS3876/OBS3879; OBS3877/OBS3878;<br>OBS3878/OBS3879 | pMCD-S5             |
| <i>HA-TMA46</i>                                     | OBS262/OBS3467; OBS263/OBS3298; OBS262/OBS263        | genomic DNA         |
| <i>HA-tma46-ACCH-1</i>                              | M13rev/OBS3502; M13for/OBS3503; M13rev/M13for        | pMCD-T6             |
| <i>HA-tma46-CCAH-1</i>                              | M13rev/OBS3500; M13for/OBS3501; M13rev/M13for        | pMCD-T6             |
| <i>HA-tma46-ACAH-1</i>                              | M13rev/OBS3504; M13for/OBS3505; M13rev/M13for        | pMCD-T6             |
| <i>HA-tma46-ACCH-2</i>                              | M13rev/OBS3506; M13for/OBS3507; M13rev/M13for        | pMCD-T6             |
| <i>HA-tma46-CCAH-2</i>                              | M13rev/OBS3500; M13for/OBS3501; M13rev/M13for        | pMCD-T6             |
| <i>HA-GIR2</i>                                      | OBS3296/OBS2596; OBS3297/OBS2595;<br>OBS2595/OBS2596 | genomic DNA         |
| <i>HA-ARWD/G1</i>                                   | OBS3883/OBS3880; OBS3882/OBS3881;<br>OBS3880/OBS3881 | pMCD-G2             |
| <i>HA-ADFRP</i>                                     | OBS3884/OBS3880; OBS3885/OBS3881;<br>OBS3880/OBS3881 | pMCD-G2             |

**Supplementary Table S4: Oligonucleotides used in this study**

| <b>Primers</b> | <b>Sequences 5'-3'</b>                                                   |
|----------------|--------------------------------------------------------------------------|
| <b>M13 for</b> | CGCCAGGGTTTTCCAGTCACGAC                                                  |
| <b>M13 rev</b> | AGCGGATAACAATTTACACAGGA                                                  |
| <b>OBS256</b>  | GGAGGAAATGAATTGGCACGTAGCTCGTGAACATGATGAACTGTGCGTACGCTGCAGGTCGAC          |
| <b>OBS257</b>  | TTATATATACGGTGGCATATATACAGTTTAGTCTATATGAATTTTAGAATCGATGAATTCGAGCTCG      |
| <b>OBS262</b>  | GAAGGGCCGGTAACTGCTCA                                                     |
| <b>OBS263</b>  | TTGTCGGGCGGATCCGAGG                                                      |
| <b>OBS264</b>  | GGTAGCAACCCACCTTCGACATCAAAAAAGCCAACCTCCGCCACGCTCGCATCCATGGAAAAGAGAAG     |
| <b>OBS265</b>  | GTTGGTGTGTGTGCGTGTATTATATATACGGTGGCATATATACAGTTTAGTCTACGACTCACTATAGGG    |
| <b>OBS627</b>  | TGAGTCACATTTTGAAGACGAAGATGTTGTTACCATCTTGAAAAAGCGGATCCCCGGGTTAATTAA       |
| <b>OBS628</b>  | CCGATACCCCTTTTCGAATACAAATGCTTGTATATTCAATTATGAAGAATTCGAGCTCGTTTAAAC       |
| <b>OBS1111</b> | TTTGAAGCTAGATGCAGTAGGTGCAAGCGTAGAGTTGTTGATTGAGCAAACGTACGCTGCAGGTCGAC     |
| <b>OBS1112</b> | CCGATACCCCTTTTCGAATACAAATGCTTGTATATTCAATTATGAATTATCGATGAATTCGAGCTCG      |
| <b>OBS1118</b> | GGTTGAGTCACATTTTGAAGACGAAGATGTTGTTACCATCTTGAAAAAGTCCATGGAAAAGAGAAG       |
| <b>OBS1119</b> | CCGATACCCCTTTTCGAATACAAATGCTTGTATATTCAATTATGAATTATACGACTCACTATAGGG       |
| <b>OBS1959</b> | GTAATAACGAGATACGCATTATCAAACTAACGTAACAAGCACTACAAAACGTACGCTGCAGGTCGAC      |
| <b>OBS1960</b> | CGATGCTGATCTGTGTTTTTCATGTTCTTTAAAAATCTATTCAATTTATA TCGATGAATTCGAGCTCG    |
| <b>OBS1961</b> | CTTAAACCACAGGATTGATGATGAAGATGTAGTTTCTTTATTTCGCGAAAATCCATGGAAAAGAGAAG     |
| <b>OBS1962</b> | CAGTTCTCGATGCTGATCTGTGTTTTTCATGTTCTTTAAAAATCTATTTCATACGACTCACTATAGGG     |
| <b>OBS2058</b> | CCCCGTCGACCATATGTCTACTACAGTTGAAAAAATC                                    |
| <b>OBS2059</b> | CCCCGCATGCTCGAGCCCTCGGTAGCATAACATTTTAA                                   |
| <b>OBS2060</b> | TGATTCTCGAACAAAAAATAATATAAG                                              |
| <b>OBS2061</b> | ATATTATTTTTTGTTCGAGAATCACCACATGACTTGCAACAGCTCGTC                         |
| <b>OBS2065</b> | GTTTGTGCGGTTTCGTGTCGGTGGGAAATC                                           |
| <b>OBS2066</b> | GATTTCCCCACCGACACGAACCCGACAAAC                                           |
| <b>OBS2067</b> | GTCGGTGGGAAAAATACATTACTGTCC                                              |
| <b>OBS2068</b> | GGACAGTAATGTATTTTTCCCCACCGAC                                             |
| <b>OBS2069</b> | GGTCCCGTCCGGTGGCGAAATCTACATTAC                                           |
| <b>OBS2070</b> | GTAATGTAGATTTCCGCCACCGACGGGAACC                                          |
| <b>OBS2071</b> | GTAATGTAGATTTCCGCCACCGACGGGAACC                                          |
| <b>OBS2072</b> | CTTGACAGTAATGTAGCTGCCGCCACCGACGGGAACC                                    |
| <b>OBS2073</b> | GTTGATTTACCTGGTCAAATCGATGGTGCTAAGG                                       |
| <b>OBS2074</b> | CCTTAGCACCATCGATTTGACCAGGTAATCCAAC                                       |
| <b>OBS2075</b> | CCAAATGTTGGCTTTACCTGCTATTATCGATGGTG                                      |
| <b>OBS2076</b> | CACCATCGATAATAGCAGGTAAAGCCAACATTTGG                                      |
| <b>OBS2077</b> | CTATGTGTTAATCAAGATTGCTTCTCTGTC                                           |
| <b>OBS2078</b> | GACAGAGAAGCAATCTTGATTAACACATAG                                           |
| <b>OBS2080</b> | GCCGTGGCAAGAACCTGTAACCTG                                                 |
| <b>OBS2081</b> | CTTACC GAATTCCTAATGCCGTG                                                 |
| <b>OBS2592</b> | AATTTAAGGAAAAGCCCTCCCTCCATATCCAGAAGGCACCTGTTAATACTCGTACGCTGCAGGTCGAC     |
| <b>OBS2593</b> | ATGTCATTATCCATGCAGAAGAAAATACTTAAATACTTAAAGTACACAAGTATATCGATGAATTCGAGCTCG |
| <b>OBS2595</b> | CAGGCATCGTTAGATTGGC                                                      |
| <b>OBS2596</b> | GCCCGTCCCTCAGGCTACAAAG                                                   |
| <b>OBS2834</b> | GGCGGATCCCAGTAGTCTGTGTTGTTCT                                             |
| <b>OBS2837</b> | GGCCTGCAGTCAAGAGGAGATGTGTCAA                                             |
| <b>OBS3151</b> | ACCATTGGAATTGTGAGAAGTAGATCCGTACCATCAATAGCCGGCTCAAGCACAGGAAAACAGCTATGACC  |
| <b>OBS3152</b> | ATTTCCACTGTTATCTTTCACAAAATAATTGTTGTTTAAATTGTGTCTCAGTTGTAACGACGGCCAGT     |
| <b>OBS3153</b> | ATTAATGACGCTTTAGGATTACGTTATGATATGGTCCATAAACTAATCTCTCCATGGAAAAGAGAAG      |
| <b>OBS3154</b> | AGATAGATTTCCACTGTTATCTTTCACAAAATAATTGTTGTTTAAATTGTGTACGACTCACTATAGGG     |
| <b>OBS3219</b> | CCCGAGGCCATGGTTTGCTCAATCAACAACCTCTACGC                                   |
| <b>OBS3296</b> | CCTGACTATGCGGGCTATCCCTATGACGTCCCGGACTATGCAGATTATAAGGAAGAACAGAAGCAGGA     |
| <b>OBS3297</b> | GGGATAGCCCGCATAGTCAGGAACATCGTATGGGTATGCCATAGTATTAACAAGTGCCTTCTGGA        |
| <b>OBS3298</b> | CCTGACTATGCGGGCTATCCCTATGACGTCCCGGACTATGCACCACCAAAAAAGGGAAAACAGGC        |
| <b>OBS3467</b> | GGGATAGCCCGCATAGTCAGGAACATCGTATGGGTATGCCATCTTCGAAATATAACTTTCTGTC         |
| <b>OBS3500</b> | AACAAAAGTGCCAAAGCTAAGTTCTCACATGAC                                        |
| <b>OBS3501</b> | GTCAATGTGAGAACTTAGCTTTGGCACCTTTGTT                                       |

|                |                                                                            |
|----------------|----------------------------------------------------------------------------|
| <b>OBS3502</b> | CCCAAGTCCATGGTTTGGCGCTCTGTTCAAACCTG                                        |
| <b>OBS3503</b> | CAGTTTGAACAGAGCAGCAACCATGGACTTGGG                                          |
| <b>OBS3504</b> | ACCACCACCGACAAAAGTAGCCAAATACTTCATCGAG                                      |
| <b>OBS3505</b> | CTCGATGAAGTATTTGGCTACTTTGTCGGTGGTGGT                                       |
| <b>OBS3506</b> | AACGGAGGTGACAAAAGCTATGTACAGACACTCC                                         |
| <b>OBS3507</b> | GGAGTGTCTGTACATAGCTTTGTACCTCCGTT                                           |
| <b>OBS3872</b> | TATGATATGGTCCATAAACTAATCTCT GAGCTCAAAACCGCGGCTC                            |
| <b>OBS3873</b> | GATAGATTTCCACTGTTATCTTTCACAAAATAATTGTTGTTTAAATTGTGTCTCATCAGGTTGACTTCCCCGCG |
| <b>OBS3874</b> | AGAGATTAGTTTATGGACCATATCATA                                                |
| <b>OBS3875</b> | GTTGGCTGTTGAGTATAATGAATTGC                                                 |
| <b>OBS3876</b> | GCACCTACTGGTGCAGCTGCAGCAGACATTGCATTACTG                                    |
| <b>OBS3877</b> | CAGTAATGCAATGTCTGCTGCAGCTGCACCAGTAGGTGC                                    |
| <b>OBS3878</b> | GGAGCAAGGGAAGAAGAGC                                                        |
| <b>OBS3879</b> | GATCTGCTAGTTTGATAAAGT                                                      |
| <b>OBS3880</b> | GCTGGCGAAAGGGGGATGT                                                        |
| <b>OBS3881</b> | GCTTCCGGCTCGTATGTTGT                                                       |
| <b>OBS3882</b> | GAAGCACAAGAACGTGAAAAGAAG                                                   |
| <b>OBS3883</b> | CTTTTACGTTCTTGTGCTTCTGCATAGTCCGGGACGTCATA                                  |
| <b>OBS3884</b> | CTCGAGAAGCAGTACGAGCTGTAAATACTTGTGTACTTAAGTATTTA                            |
| <b>OBS3885</b> | CAGCTCGTACTGCTTCTCGAG                                                      |
| <b>OBS3886</b> | TGCAAACCTATGACATTTTATACACTTTACAATACCAATGAGAATGCGTTTGTTCATGAAAAAGAGAAG      |

### Supplementary Figure S1

Polysomes extracts were prepared from cells expressing both Rbg1 and Rbg2 epitope-tagged proteins from their genomic loci to avoid overproduction. Polysomes were resolved by density sedimentation in 10%-50% sucrose gradient. ATP was included in the extraction buffer at 5mM and in the gradient buffer at 2.5mM. Since gradient contained 2.5mM ATP, UV absorbance trace (254 nm) was not monitored during fractionation. Fractions (numbered) were analyzed by western blotting to detect the TAP and HA tags. The 60S ribosomal protein Rpl1a was detected with specific rabbit polyclonal antibodies and used to position the 60S subunit, 80S ribosomes and polysomes. The 40S was positioned according to previous gradient fractionation. To demonstrate the specificity of the association of factors to polysomes or ribosomes, those were dissociated by treating extracts with RNase A prior to fractionation on the sucrose gradient.

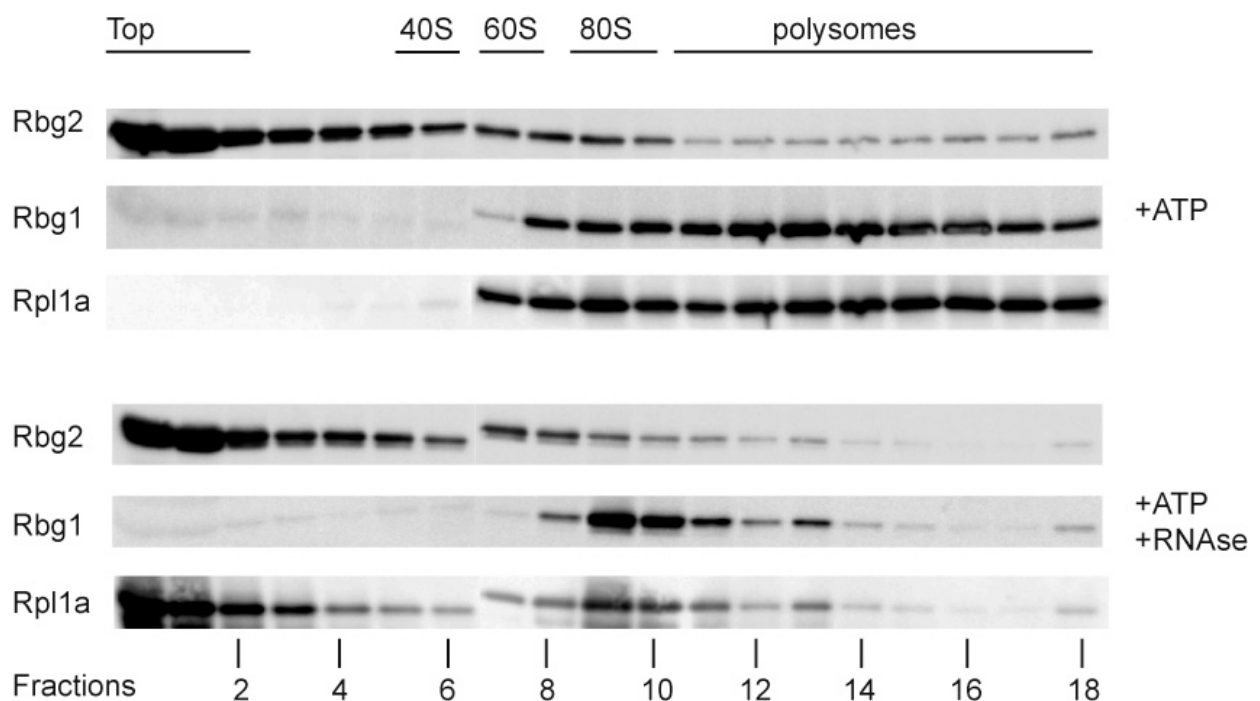

## Supplementary Figure S2

Growth behavior of yeast strains carrying combinations of deletions of *RBG1*, *TMA46*, *RBG2*, or *GIR2* genes. Serial dilutions of exponential liquid cultures were spotted on YPDA plates and incubated two days at 30°C.

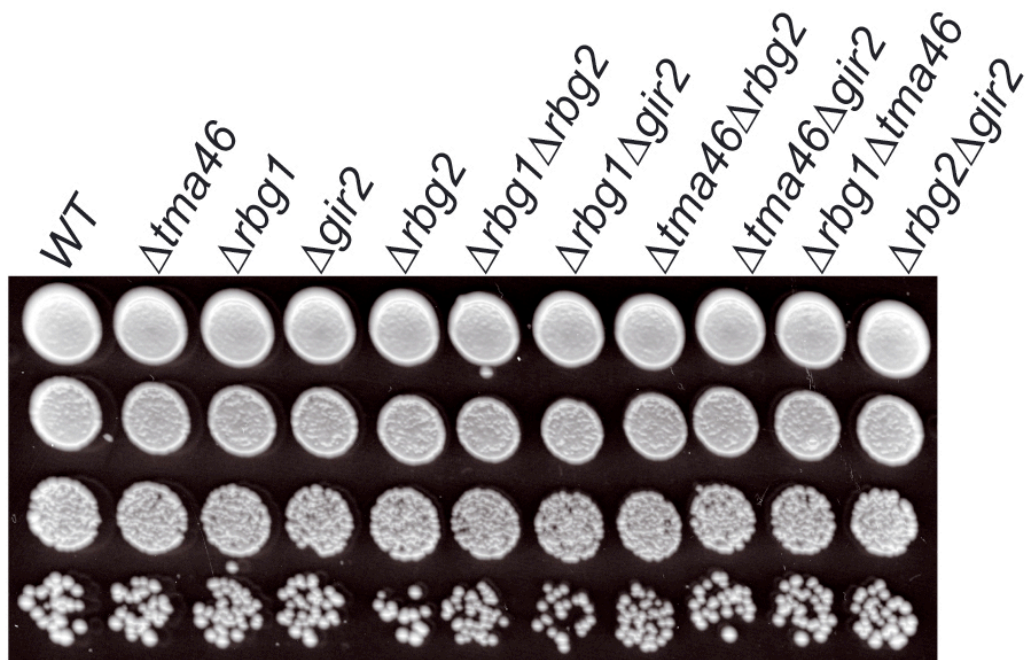

## References

1. Schmidt, A., Bickle, M., Beck, T. and Hall, M.N. (1997) The yeast phosphatidylinositol kinase homolog TOR2 activates RHO1 and RHO2 via the exchange factor ROM2. *Cell*, **88**, 531-542.
2. De La Cruz, J., Iost, I., Kressler, D., and Linder, P. (1997) The p20 and Ded1 proteins have antagonistic roles in eIF4E-dependent translation in *Saccharomyces cerevisiae*. *Proc Natl Acad Sci U S A*, **94**, 5201-5206.
3. Schmid, S.R., and Linder, P. (1991) Translation initiation factor 4A from *Saccharomyces cerevisiae*: analysis of residues conserved in the D-E-A-D family of RNA helicases. *Mol Cell Biol*. **11**, 3463-3471.
4. Longtine, M.S., McKenzie, A., 3rd, Demarini, D.J., Shah, N.G., Wach, A., Brachat, A., Philippsen, P. and Pringle, J.R. (1998) Additional modules for versatile and economical PCR-based gene deletion and modification in *Saccharomyces cerevisiae*. *Yeast*, **14**, 953-961.
5. Rigaut, G., Shevchenko, A., Rutz, B., Wilm, M., Mann, M. and Séraphin, B. (1999) A generic protein purification method for protein complex characterization and proteome exploration. *Nat Biotechnol*, **17**, 1030-1032.
6. De Antoni, A. and Gallwitz, D. (2000) A novel multi-purpose cassette for repeated integrative epitope tagging of genes in *Saccharomyces cerevisiae*. *Gene*, **246**, 179-185.
7. Prouteau, M., Daugeron, M.C. and Séraphin, B. (2008) Regulation of ARE transcript 3' end processing by the yeast Cth2 mRNA decay factor. *Embo J.*, **27**, 2966-2976.
